# Supplementary material
Source: publisher figshare collection journal article supplement (https://gsajournals.figshare.com/articles/dataset/_/13023269)
Supplement: Supplementary file 1 [file 1]

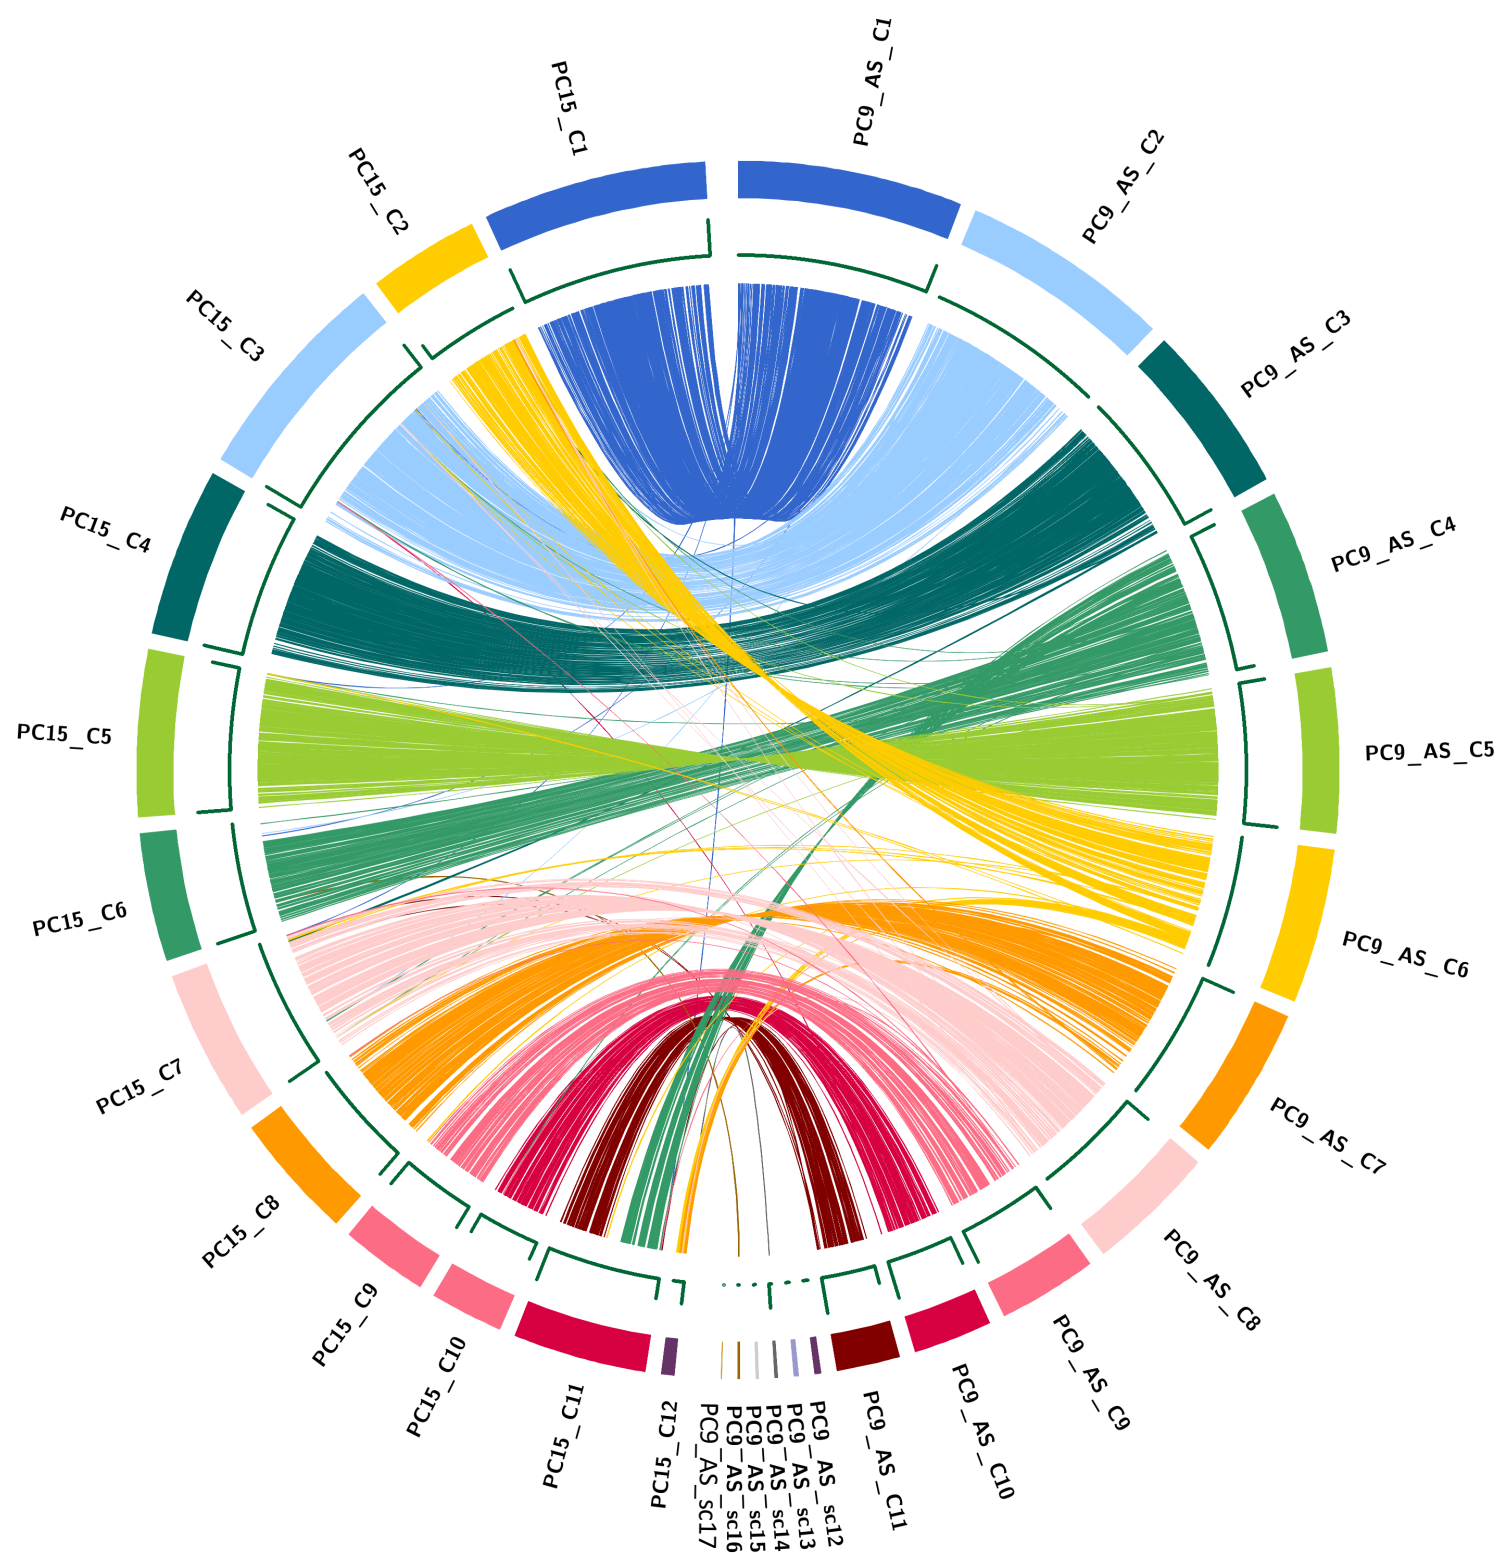

**Figure S1.** Comparisons between PC9\_AS and PC15 genome of *P. ostreatus* strains. Circos plot showing regions of similarity shared between PC9\_AS (scaffolds 1-17) and PC15 (scaffolds 1-12) (identity>95%, length>10-kb). Tracks (outer to inner) represent the distribution of genomic features in each assembly: 1) sizes (in Mb) of scaffolds, with numbers prefixed by the letter “C” indicating the order of scaffold size; 2) distribution of telomere repeats with 1-kb sliding windows, ranging between 10-30 repeats
